# Supplementary material
Source: publisher figshare collection journal article supplement (https://tandf.figshare.com/ndownloader/files/12792770)
Supplement: Supplementary file 1 [file 12792770]

# Supporting Information

**Self-Supporting Soft Carbon Fibers as Binder-free and Flexible Anodes for High-Performance Sodium-Ion Batteries**

Xueping Gaoa#, Yongling Ana#, Wenshu Zhanga, Menglan Yua, Lijie Cia, Jinkui Fenga*

*aSDU & Rice Joint Center for Carbon Nanomaterials, Key Laboratory for Liquid–Solid Structural Evolution & Processing of Materials (Ministry of Education), School of Materials Science and Engineering, Shandong University, Jinan 250061, China.*

*Corresponding author: Jinkui Feng, E-mail: [jinkui@sdu.edu.cn](mailto:jinkui@sdu.edu.cn)

#These authors contributed equally to this work


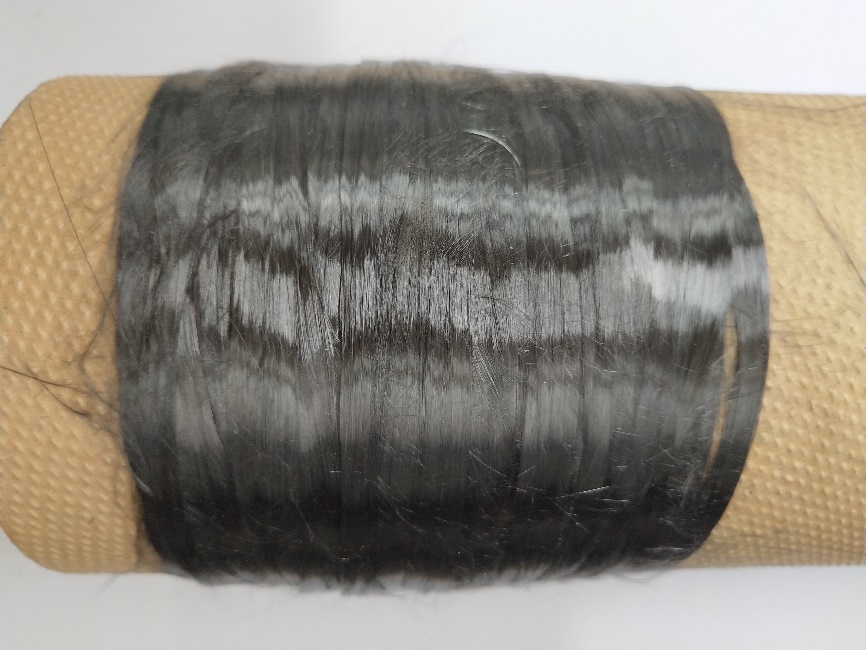


Figure S1. Photo of the carbon fiber.





Figure S3. TGA curves of PAN precursor.


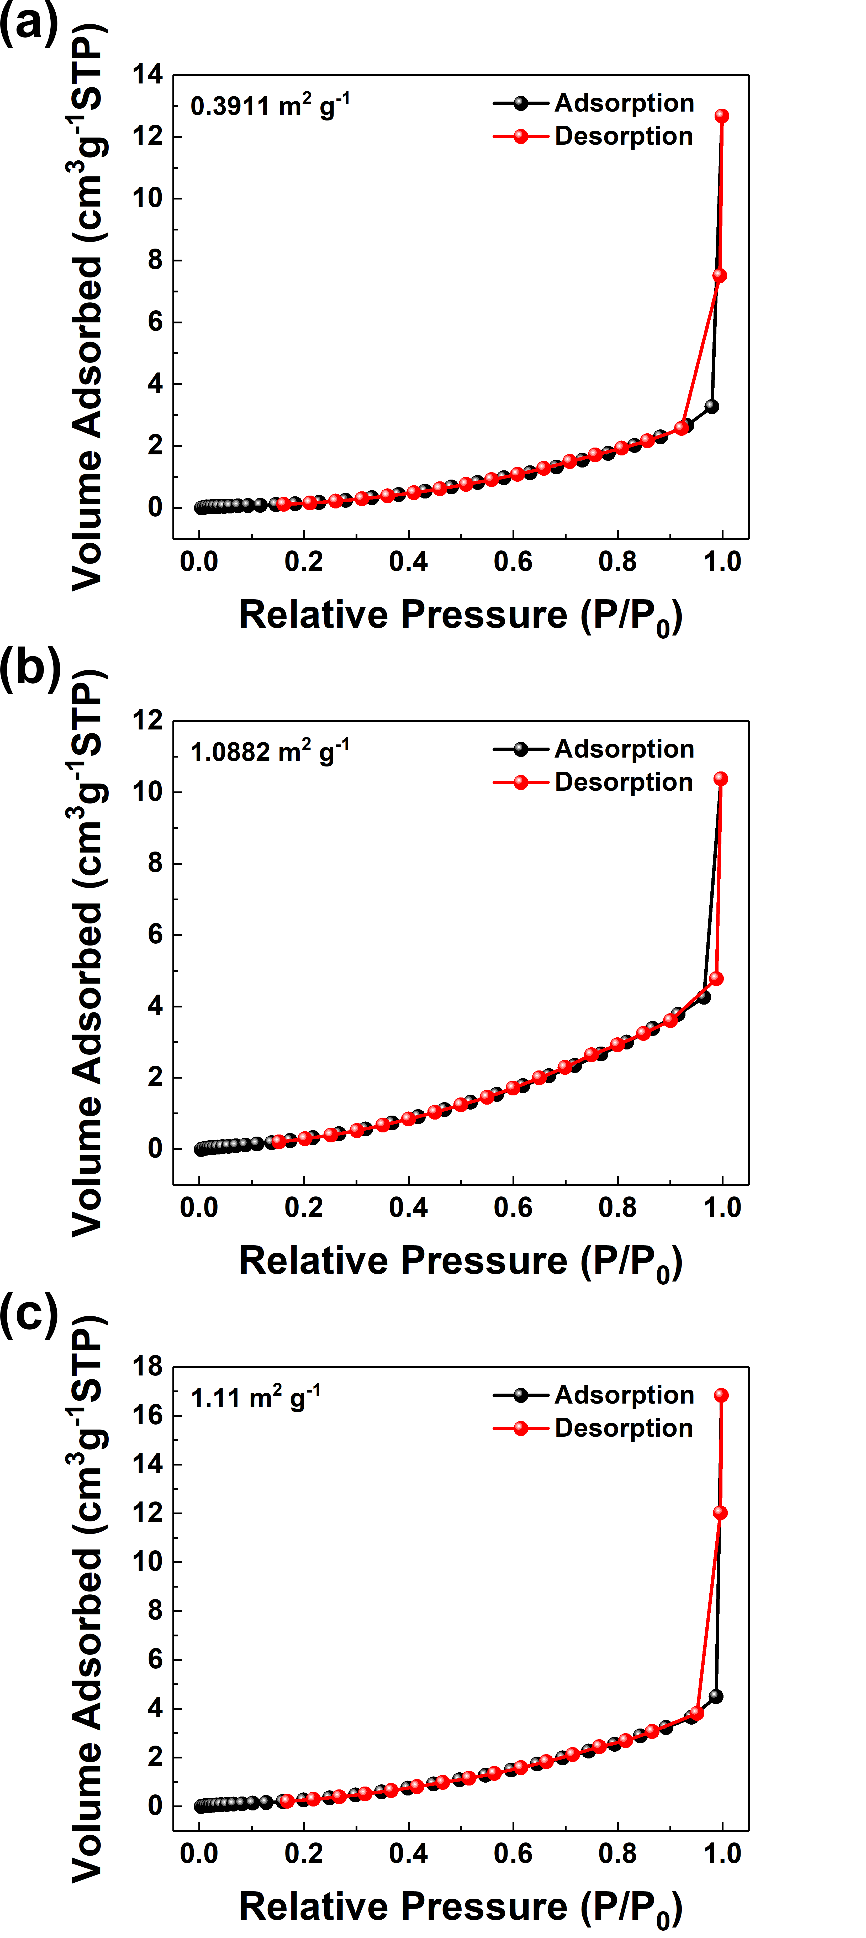


Figure S3. Nitrogen adsorption−desorption isotherm of the carbon fiber at 800 oC (a), 1200 oC (b) and 2300 oC (c).
